# Supplementary material
Source: Springer Nature journal article supplement (https://www.springermedizin.de/resource/supplementary/13058_2012_3023_MOESM3_ESM.pdf/9703104)

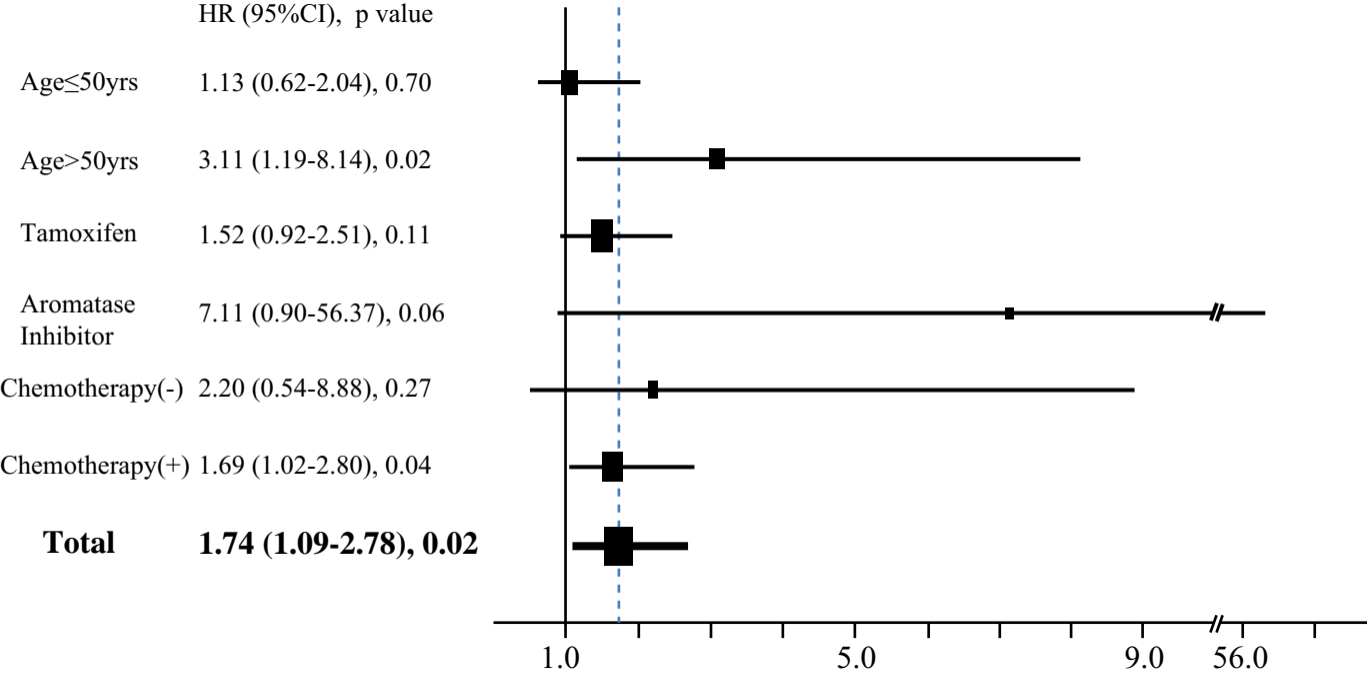

Supplement: MOESM3 [file 9703104]
